# Supplementary material for: Co, Fe decorated N, S co-doped porous carbon enables high stability for the oxygen reduction reaction
Source: Royal Society of Chemistry journal article supplement (doi:10.1039/d3cy01323e), 2024-01-01
Supplement: d3cy01323e1.pdf [file d3cy01323e1.pdf]

## Electronic Supplementary Information

### **Co, Fe decorated N, S co-doping porous carbon enables high stability for oxygen reduction reaction**

Qiulan Huang <sup>a</sup>, Ruiqin Ren <sup>a</sup>, Jia Li <sup>a</sup>, Muhammad Waqas <sup>b</sup>, Pan Chen <sup>a</sup>, Xiaotian Liu <sup>a</sup>, Dujuan Huang <sup>a</sup>, Zhongyun Yang <sup>a</sup>, Xinglan Peng <sup>a</sup>, Du-Hong Chen <sup>\* a</sup>, Youjun Fan <sup>\* a</sup>, and Wei Chen <sup>\* a</sup>

<sup>a</sup> *Guangxi Key Laboratory of Low Carbon Energy Materials, School of Chemistry and Pharmaceutical Sciences, Guangxi Normal University, Guilin 541004, China*

<sup>b</sup> *Guangdong Key Laboratory for Biomedical Measurements and Ultrasound Imaging, National-Regional Key Technology Engineering Laboratory for Medical Ultrasound, School of Biomedical Engineering, Shenzhen University Medical School, Shenzhen 518060, China*

*E-mail addresses: dhchen@gxnu.edu.cn (D.-H. Chen),*

*youjunfan@mailbox.gxnu.edu.cn (Y.-J. Fan), weichen@mailbox.gxnu.edu.cn (W.*

*Chen).*

## Calculation of the number of transferred electrons using the K-L equation:

The dynamics of ORR on the prepared catalysts were studied in more detail by

K-L equation:

$$\frac{1}{j} = \frac{1}{j_k} + \frac{1}{j_l} = \frac{1}{j_k} + \frac{1}{B\omega^{\frac{1}{2}}} \quad (B = 0.2nFC_0D_0^{\frac{2}{3}}V^{-\frac{1}{6}})$$

where  $j$  is the measured current density,  $j_k$  and  $j_l$  are the kinetic and limiting current densities,  $\omega$  is the angular velocity of the disk,  $n$  is the electron transfer number,  $F$  is the Faraday constant (96485 C mol<sup>-1</sup>),  $C_0$  is the bulk concentration of O<sub>2</sub> (1.6×10<sup>-6</sup> mol L<sup>-1</sup>),  $D_0$  is the diffusion coefficient of O<sub>2</sub> in 0.1 M KOH, and  $V$  is the kinematic viscosity of the electrolyte (0.01 cm<sup>2</sup> s<sup>-1</sup>). By adjusting the rotational speed of LSV, a good linear relationship between  $j^{-1}$  and  $\omega^{-1/2}$  was observed at 0.3, 0.4, 0.5, and 0.6 V for the samples as shown in Fig. 3d. The electron transfer number  $n$  can be obtained by substituting the slope into the abovementioned equation. Here, the value of  $n$  is 3.99 for FeCo-SNC.

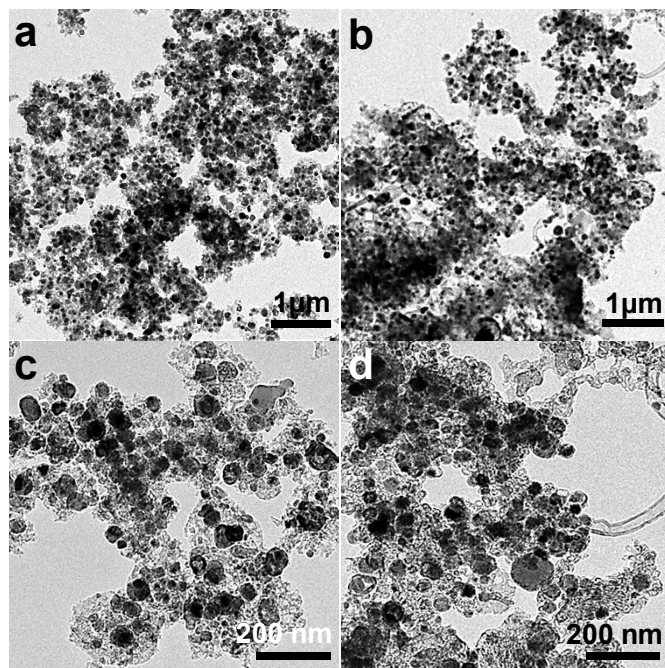

**Fig. S1** TEM images of Co-NC (a, c), FeCo-NC (b, d).

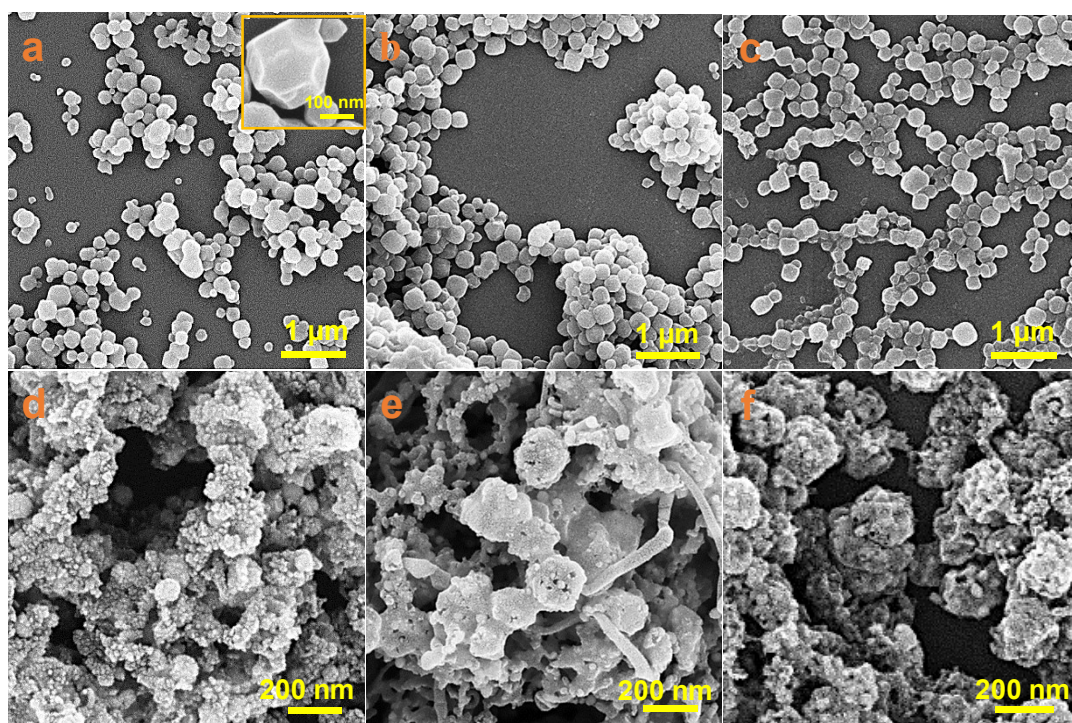

**Fig. S2** SEM images of (a) ZIF-67 (inset is a magnified ZIF-67), (b) FePc/ZIF-67, (c) FeTsPc/ZIF-67, (d) Co-NC, (e) FeCo-NC, (f) FeCo-SNC.

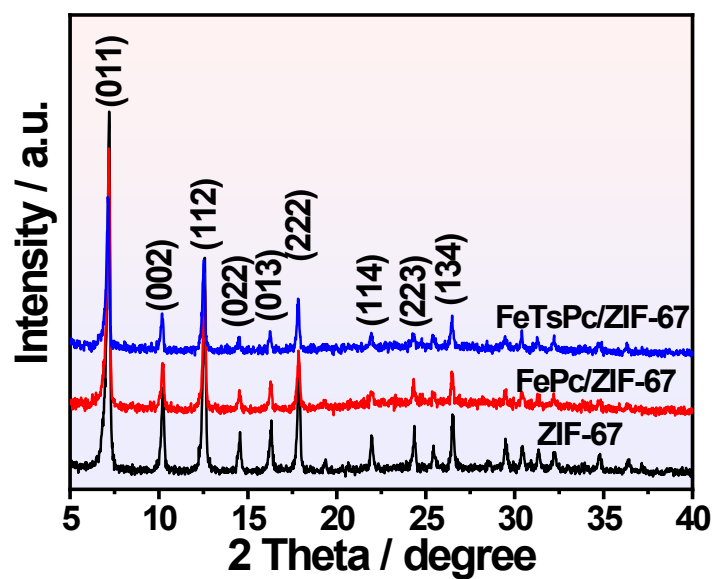

**Fig. S3** XRD patterns of the prepared ZIF-67, FePc/ZIF-67 and FeTsPc/ZIF-67 catalysts, respectively.

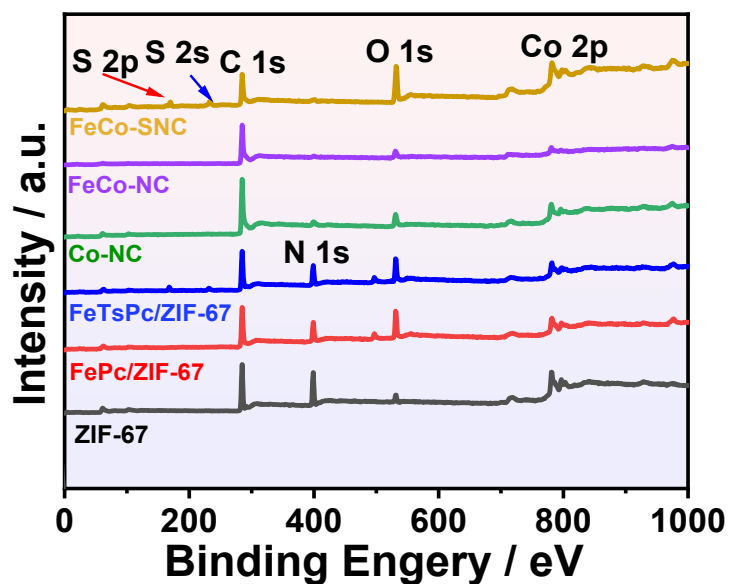

**Fig. S4** Full-survey spectra of ZIF-67, FePc/ZIF-67, FeTsPc/ZIF-67, Co-NC, FeCo-NC and FeCo-SNC, respectively.

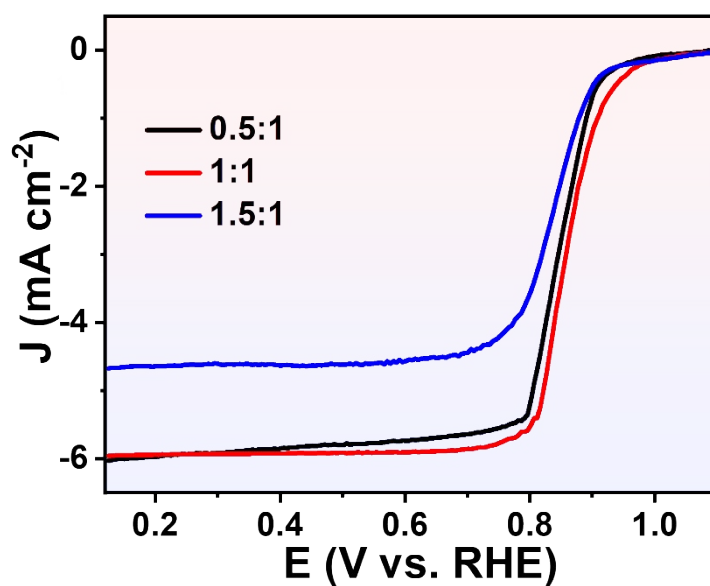

**Fig. S5** LSV curves of FeCo-SNC obtained under different mass ratio of FeTsPc to ZIF-67 in an O<sub>2</sub>-saturated 0.1 M KOH electrolyte at a rotation rate of 1600 rpm with a scan rate of 10 mV s<sup>-1</sup>.

**Table S1** The comparison of ORR activity on the reported catalysts.

| Catalysts                | E <sub>1/2</sub> (V) | References |
|--------------------------|----------------------|------------|
| FeCo-SNC                 | 0.856                | This work  |
| Co <sub>2</sub> P/Co-N-C | 0.82                 | 1          |
| FeCo/NSC                 | 0.82                 | 2          |
| Fe porphyrin/CNT         | 0.84                 | 3          |
| O-Co-N/C                 | 0.85                 | 4          |
| meso-Fe-N-C              | 0.85                 | 5          |
| MPF/M = Fe, Co           | 0.813                | 6          |
| Fe-ND/C                  | 0.79                 | 7          |
| Fe SA-NSC-900            | 0.86                 | 8          |
| Fe-N-C/PC                | 0.85                 | 9          |
| FeCo-NCNFs-800           | 0.85                 | 10         |

## References

- 1 Q. P. Xu, Xiaomin Zhu, Zhaogen Luo, Kaifen Liu, Yiyi Yuan, Dingsheng, *Int J Hydrogen Energy*, 2022, **47**, 16518-16527.
- 2 S. Chang, H. Zhang, Z. Zhang, *J. Energy Chem.*, 2021, **56**, 64-71.
- 3 L. Xie, X.-P. Zhang, B. Zhao, P. Li, J. Qi, X. Guo, B. Wang, H. Lei, W. Zhang, U.-P. Apfel, R Cao, *Angew. Chem. Int. Edit.*, 2021, **60**, 7576-7581.
- 4 C.-H. X. W. Zhang, H. Zheng, R. Li, K. Zhou, *Adv. Funct. Mater.*, 2022, **32**, 2200763.
- 5 Y. Y. Zhou, Y. Ma, D. Foucher, A. C. Xiong, L. Zhang, J. Stach, E. A. Yue, Q. Kang, Y. jin, *ACS Catal.*, 2020, **11**, 74-81.
- 6 S. M. Akula, M. Kozlova, J. Käärrik, M. Treshchalov, A. Kikas, A. Kisand, V. Aruväli, J. Paiste, P. Tamm, A. Leis, J. Tammeveski, Kaido, *Chem. Eng. J.*, 2023, **458**, 141468.
- 7 P. Su, W. Huang, J. Zhang, U. Guharoy, Q. Du, Q. Sun, Q. Jiang, Y. Cheng, J. Yang, X. Zhang, Y. Liu, S. P. Jiang, J. Liu, *Nano Res.*, 2020, **14**, 1069-1077.
- 8 M. Wang, W. Yang, X. Li, Y. Xu, L. Zheng, C. Su, B. Liu, *ACS Energy Lett.*, 2021, **6**, 379-386.
- 9 J. Guo, Y. Li, Y. Cheng, L. Dai, Z. Xiang, *ACS Nano* 2017, **11**, 8379-8386.
- 10 L. Yang, S. Feng, G. Xu, B. Wei, L. Zhang, *ACS Sustainable Chem. Eng.*, 2019, **7**, 5462-5475.
